# Supplementary material for: Cell Line Secretome and Tumor Tissue Proteome Markers for Early Detection of Colorectal Cancer: A Systematic Review
Source: Cancers (Basel). 2017 Nov 16;9(11):156. doi: 10.3390/cancers9110156 (PMC5704174; doi:10.3390/cancers9110156)
Supplement: Supplementary file 1 [file cancers-09-00156-s001.pdf]

# Supplementary Materials: Cell Line Secretome and Tumor Tissue Proteome Markers for Early Detection of Colorectal Cancer: A Systematic Review

Megha Bhardwaj, Vanessa Erben, Petra Schrotz-King and Hermann Brenner

## Supplementary Material File S1: Data sources and search strategy

*for PubMed*

“Colorectal neoplasm” OR “colon neoplasm” OR “colonic neoplasm” OR “Rectal Neoplasm” OR “colorectal cancer” OR “colon cancer” OR “colonic cancer” OR CRC OR “Colorectal tumor” OR “colon tumor” OR “colonic tumor” OR adenoma

AND

“Cell Line, Tumor”[Mesh] OR “Tumor Microenvironment”[Mesh] OR secretome OR Tissue

AND

“Proteins”[Mesh] OR Proteome OR Proteomics

AND

“Diagnosis” [Mesh] OR sensitivity OR specificity OR AUC OR “area under the curve”

AND

Blood OR Plasma OR Serum

NOT

Therapy OR Treatment OR Progression

**As on 18.07.2017-**

**Pubmed: 1498 records**

*for Web of Science*

**TOPIC:** (Colorectal neoplasm OR colon neoplasm OR colonic neoplasm OR Rectal Neoplasm OR colorectal cancer OR colon cancer OR colonic cancer OR CRC OR Colorectal tumor OR colon tumor OR colonic tumor OR adenoma)

AND

**TOPIC:** (Cell Line OR Tumor OR Tumor Microenvironment OR secretome OR Tissue)

AND

**TOPIC:** (Proteins OR Proteome OR Proteomics)

AND

**TOPIC:** (Diagnosis OR sensitivity OR specificity OR AUC OR area under the curve)

AND

**TOPIC:** (Blood OR Plasma OR Serum)

NOT

**TOPIC:** (Therapy OR Treatment OR Progression)

**As on 18.07.2017-**

**Web of Science: 865 records**

**Table S2.** Stage specific diagnostic performance

[illegible]

|                                                          |    |  |  |     |     |     |    |    |  |                      |          |    |  |  |                      |          |  |  |
|----------------------------------------------------------|----|--|--|-----|-----|-----|----|----|--|----------------------|----------|----|--|--|----------------------|----------|--|--|
| Barderas, 2013[53]                                       |    |  |  | 6   | 7   | 12  | 15 |    |  |                      |          |    |  |  |                      |          |  |  |
| Ji, 2013 [22]                                            | 45 |  |  | 102 | 110 | 109 | 84 |    |  |                      |          |    |  |  |                      |          |  |  |
| Wang, 2013 [25]<br>Kininogen-1<br>CEA                    |    |  |  | 14  | 63  | 37  | 29 |    |  | 70<br>39             | 73<br>35 |    |  |  | 66<br>86             | 66<br>86 |  |  |
| Jiang, 2014 [23]<br>DC-SIGN<br>DC-SIGNR<br>CEA<br>CA19-9 |    |  |  | 5   | 68  | 44  | 69 |    |  | 81<br>49<br>19<br>10 |          |    |  |  | 56<br>93<br>92<br>95 |          |  |  |
| Niewiarowska, 2014 [64]                                  |    |  |  | 1   | 4   | 38  |    |    |  |                      |          |    |  |  |                      |          |  |  |
| Shin, 2014 [46]                                          | 11 |  |  | 68  | 68  | 65  | 27 |    |  |                      |          |    |  |  |                      |          |  |  |
| Sole, 2014 [55]                                          | 23 |  |  | 9   | 27  | 34  | 10 |    |  |                      |          |    |  |  |                      |          |  |  |
| Toiyama, 2014 [43]                                       |    |  |  | 48  | 55  | 54  | 38 |    |  | 54                   |          |    |  |  | 93                   |          |  |  |
| Xue, 2014 [29]                                           |    |  |  | 20  | 56  | 26  | 18 |    |  |                      |          |    |  |  |                      |          |  |  |
| Chiang, 2015 [37]                                        |    |  |  | 61  |     | 59  |    |    |  |                      |          |    |  |  |                      |          |  |  |
| Lin, 2015 [49]                                           |    |  |  | 6   | 9   | 22  | 8  |    |  |                      |          |    |  |  |                      |          |  |  |
| Qiao, 2015 [24]                                          |    |  |  |     |     |     |    |    |  |                      |          |    |  |  |                      |          |  |  |
| Surinova, 2015 [58]                                      |    |  |  | 43  | 58  | 49  | 52 |    |  |                      |          |    |  |  |                      |          |  |  |
| Taguchi, 2015 [67]                                       | 60 |  |  | 11  | 19  | 21  | 9  | 35 |  | 47                   | 50       | 95 |  |  | 95                   | 95       |  |  |
| Zhang, 2015 [33]                                         |    |  |  |     |     |     |    |    |  |                      |          |    |  |  |                      |          |  |  |
| Fan, 2016 [31]                                           |    |  |  |     |     |     |    |    |  |                      |          |    |  |  |                      |          |  |  |
| Wang X, 2016 [26]                                        |    |  |  |     |     |     |    |    |  |                      |          |    |  |  |                      |          |  |  |
| Wang Y, 2016 [32]                                        |    |  |  |     | 7   | 9   |    |    |  |                      |          |    |  |  |                      |          |  |  |
| Xie, 2016 [34]                                           |    |  |  |     |     |     |    |    |  |                      |          |    |  |  |                      |          |  |  |

Abbreviations: Ad- Adenoma, AA- Advanced adenoma, ACA- Adenocarcinoma. Note- Stages I/II/III/IV as per UICC classification of tumors and stages A/B/C/D as per AJCC classification.

**Table S3.** Function and location of proteins as identified from UniProt database [19].

| Protein              | Molecular Function                                                                      | Biological Function                                                                              | Location             | Cellular component                          |
|----------------------|-----------------------------------------------------------------------------------------|--------------------------------------------------------------------------------------------------|----------------------|---------------------------------------------|
| A1AT                 | serine protease inhibitor, glycoprotein binding                                         | Acute phase, Blood coagulation, Hemostasis                                                       | secreted             | endoplasmic reticulum, extracellular matrix |
| ACVR2B               | ATP binding, growth factor binding, protein serine/threonine/tyrosine kinase activity   | activation of protein kinase activity                                                            | cell membrane        | cytoplasm                                   |
| Adipophilin          | development and maintenance of adipose tissue                                           | lipid storage and long-chain fatty acid transport                                                | membrane             | endoplasmic reticulum, cytosol              |
| AK1                  | Kinase, Transferase                                                                     | ATP-binding, Nucleotide-binding                                                                  | cytoplasm            | extracellular exosome                       |
| ANGPTL2              | receptor binding                                                                        | multicellular organism development                                                               | secreted             | extracellular space                         |
| AOPJ75               |                                                                                         |                                                                                                  |                      |                                             |
| AZGP1                | antigen binding, glycoprotein binding                                                   | antigen processing and presentation, cell adhesion                                               | secreted             | extracellular exosome                       |
| $\alpha$ -defensin 6 | Antibiotic, Antimicrobial, Defensin, Fungicide                                          | antimicrobial humoral immune response                                                            | secreted             | extracellular region                        |
| BAC85857             |                                                                                         |                                                                                                  |                      |                                             |
| BST2                 | metalloendopeptidase inhibitor activity, protein homodimerization activity, RNA binding | Antiviral defense, B-cell activation, Immunity, Innate immunity                                  | golgi apparatus      | extracellular exosome                       |
| CA 19-9              | glycoprotein                                                                            | tumor marker                                                                                     |                      |                                             |
| CEA                  | glycoprotein                                                                            | tumor marker                                                                                     |                      |                                             |
| CELA1                | Hydrolase, Protease, Serine protease, metal-ion binding                                 | inflammatory response, elastin catabolic process                                                 | secreted             | extracellular space                         |
| CELA2                | Hydrolase, Protease, Serine protease, metal-ion binding                                 | cornification                                                                                    | secreted             | extracellular space                         |
| CHI3L1               | Antimicrobial, carbohydrate binding, extracellular matrix structural constituent        | Apoptosis, Inflammatory response                                                                 | secreted             | cytoplasm, extracellular space              |
| Clusterin            | Chaperone                                                                               | Apoptosis, Complement pathway, Immunity, Innate immunity                                         | secreted             | cytoplasm, extracellular matrix             |
| COL10A1              | metal ion binding                                                                       | cartilage development, collagen catabolic process                                                | secreted             | extracellular matrix                        |
| COL3A1               | calcium binding, metal ion binding, integrin binding                                    | aging, cell-matrix adhesion, collagen catabolic process                                          | secreted             | extracellular matrix                        |
| COL6A3               | Protease inhibitor, Serine protease inhibitor                                           | Cell adhesion                                                                                    | secreted             | extracellular matrix                        |
| CP                   | chaperone binding, copper ion binding, oxidoreductase                                   | Copper transport, Ion transport, Transport                                                       | secreted             | extracellular exosome                       |
| CRMP2                | Developmental protein                                                                   | Differentiation, Neurogenesis                                                                    | cytoplasm            | cytoskeleton, extracellular exosome         |
| CTRL                 | Hydrolase, Protease, Serine protease                                                    | digestion, proteolysis                                                                           | secreted             | extracellular space                         |
| CTSD                 | Aspartyl protease, Hydrolase, Protease                                                  |                                                                                                  | lysosome, melanosome | extracellular exosome                       |
| Cystatin SN          | Thiol protease inhibitor                                                                | detection of chemical stimulus involved in sensory perception of bitter taste                    | secreted             | extracellular space                         |
| DC-SIGN              | Host cell receptor for virus entry, Receptor                                            | Adaptive immunity, Cell adhesion, Endocytosis, Host-virus interaction, Immunity, Innate immunity | cytoplasm            | extracellular exosome                       |
| DC-SIGNR             | Host cell receptor for virus entry, Receptor                                            | Adaptive immunity, Cell adhesion, Endocytosis, Host-virus interaction, Immunity, Innate immunity | cytoplasm            | extracellular exosome                       |
| DK                   | soluble regulator of keratinocyte differentiation                                       | cornified envelope assembly                                                                      | secreted             | extracellular exosome                       |
| Protein              | Molecular Function                                                                      | Biological Function                                                                              | Location             | Cellular component                          |
| EFEMP2               | calcium ion binding, extracellular matrix structural constituent                        |                                                                                                  | secreted             | extracellular exosome                       |

|                    |                                                                                   |                                                                                                                                       |                       |                                              |
|--------------------|-----------------------------------------------------------------------------------|---------------------------------------------------------------------------------------------------------------------------------------|-----------------------|----------------------------------------------|
| <b>ESM-1</b>       | hepatocyte growth factor receptor binding                                         | Angiogenesis                                                                                                                          | secreted              | extracellular region                         |
| <b>FGFR4</b>       | Kinase, Receptor, Transferase, Tyrosine-protein kinase                            | ATP-binding, Nucleotide-binding                                                                                                       | secreted              | endoplasmic reticulum, cytoplasm             |
| <b>GDF15</b>       | Cytokine activity, Growth factor/transforming growth factor beta receptor binding | BMP signaling pathway, cell-cell signaling, cell development                                                                          | secreted              | extracellular exosome                        |
| <b>GRN</b>         | Cytokine activity, Growth factor activity                                         |                                                                                                                                       | secreted              | endoplasmic reticulum, extracellular exosome |
| <b>GTF2i</b>       | DNA-binding                                                                       | Transcription, Transcription regulation                                                                                               | cytoplasm             | nucleus, cytoplasm                           |
| <b>HMGB1</b>       | DNA-binding                                                                       | Adaptive immunity, Autophagy, Chemotaxis, DNA damage, DNA recombination, DNA repair, Immunity, Inflammatory response, Innate immunity | cytoplasm             | cell surface, extracellular exosome          |
| <b>HNP1</b>        | Antibiotic, Antimicrobial, Defensin, Fungicide                                    | Antiviral defense                                                                                                                     | secreted              | extracellular exosome                        |
| <b>HNP2</b>        | Antibiotic, Antimicrobial, Defensin, Fungicide                                    | Antiviral defense                                                                                                                     | secreted              | extracellular exosome                        |
| <b>HNP3</b>        | Antibiotic, Antimicrobial, Defensin, Fungicide                                    | Antiviral defense                                                                                                                     | secreted              | extracellular exosome                        |
| <b>HSP60</b>       | Chaperone, Hydrolase, ATPbinding                                                  | Host-virus interaction                                                                                                                | mitochondrial matrix  | cytoplasm, mitochondrion                     |
| <b>ICLN</b>        | RNA-binding                                                                       | cell volume homeostasis                                                                                                               | cytoplasm             | nucleus, cytoplasm                           |
| <b>IGFBP2</b>      | Growth factor binding                                                             | Growth regulation                                                                                                                     | secreted              | extracellular exosome                        |
| <b>Kininogen-1</b> | Protease inhibitor, Thiol protease inhibitor,, Vasodilator                        | Blood coagulation, Hemostasis, Inflammatory response                                                                                  | secreted              | extracellular exosome                        |
| <b>LAMB1</b>       | extracellular matrix structural constituent                                       | cell adhesion                                                                                                                         | secreted              | extracellular matrix                         |
| <b>LASS5</b>       | DNA-binding, Transferase                                                          | Lipid biosynthesis, Lipid metabolism, Sphingolipid metabolism                                                                         | endoplasmic reticulum | nucleus                                      |
| <b>LRG1</b>        | transforming growth factor beta receptor binding                                  | brown fat cell differentiation, neutrophil degranulation                                                                              | secreted              | extracellular exosome                        |
| <b>Mac-2BP</b>     | 5cavenger receptor activity                                                       | cell adhesion                                                                                                                         | secreted              | extracellular matrix                         |
| <b>MAPKAPK3</b>    | Kinase, Serine/threonine-protein kinase, Transferase                              | ATP-binding, Nucleotide-binding                                                                                                       | nucleus, cytoplasm    | nucleus, cytoplasm                           |
| <b>MAPRE1</b>      | cadherin binding Source, identical protein binding                                | Cell cycle, Cell division, Mitosis                                                                                                    | cytoplasm             | Cytoplasm, Microtubule                       |
| <b>MRC1</b>        | Host cell receptor for virus entry, Receptor                                      | Endocytosis, Host-virus interaction                                                                                                   | cell membrane         | endosome                                     |
| <b>MST1/STK4</b>   | Kinase, Serine/threonine-protein kinase, Transferase                              | Apoptosis                                                                                                                             | cytoplasm             | nucleus, cytoplasm                           |
| <b>NHSL1</b>       |                                                                                   | motor neuron migration                                                                                                                |                       | membrane                                     |
| <b>NNMT</b>        | Methyltransferase, Transferase                                                    | methylation                                                                                                                           | cytoplasm             | cytoplasm                                    |
| <b>p53</b>         | Activator, DNA-binding, Repressor                                                 | Apoptosis, Biological rhythms, Cell cycle, Host-virus interaction, Necrosis, Transcription, Transcription regulation                  | cytoplasm             | nucleus, cytoplasm                           |
| <b>PAI-1</b>       | Protease inhibitor, Serine protease inhibitor                                     | angiogenesis, cellular response to lipopolysaccharide                                                                                 | secreted              | extracellular exosome                        |
| <b>PEDF</b>        | serine-type endopeptidase inhibitor activity                                      | aging, cell proliferation                                                                                                             | secreted              | melanosome, extracellular exosome            |
| <b>Protein</b>     | <b>Molecular Function</b>                                                         | <b>Biological Function</b>                                                                                                            | <b>Location</b>       | <b>Cellular component</b>                    |
| <b>PIM1</b>        | Kinase, Serine/threonine-protein kinase, Transferase                              | Apoptosis, Cell cycle                                                                                                                 | cytoplasm             | cell membrane                                |
| <b>PLSCR1</b>      | DNA-binding                                                                       | Antiviral defense                                                                                                                     | cell membrane         | extracellular exosome                        |
| <b>PON1</b>        | Hydrolase                                                                         | aromatic compound catabolic process, carboxylic acid catabolic process, cholesterol metabolic process                                 | secreted              | extracellular space                          |

|                    |                                                                                       |                                                                                                                          |                       |                                  |
|--------------------|---------------------------------------------------------------------------------------|--------------------------------------------------------------------------------------------------------------------------|-----------------------|----------------------------------|
| <b>PRDX2</b>       | Antioxidant, Oxidoreductase, Peroxidase                                               | cellular response to oxidative stress                                                                                    | cytoplasm             | cytoplasm                        |
| <b>S100A8</b>      | Antimicrobial                                                                         | Apoptosis, Autophagy, Chemotaxis, Immunity, Inflammatory response, Innate immunity                                       | secreted              | cytoplasm, extracellular space   |
| <b>S100A9</b>      | Antimicrobial, Antioxidant                                                            | Apoptosis, Autophagy, Chemotaxis, Immunity, Inflammatory response, Innate immunity                                       | secreted              | cytoplasm, extracellular space   |
| <b>SEC61β</b>      | epidermal growth factor binding                                                       | Protein transport, Translocation, Transport                                                                              | cytosol               | endoplasmic reticulum            |
| <b>sE-cadherin</b> | Cell adhesion molecule binding                                                        | Cell adhesion                                                                                                            | cell membrane         | golgi apparatus                  |
| <b>SERPINA3</b>    | Protease inhibitor, Serine protease inhibitor                                         | acute-phase response, inflammatory response                                                                              | secreted              | extracellular exosome            |
| <b>SERPINI1</b>    | Protease inhibitor, Serine protease inhibitor                                         | central & peripheral nervous system development                                                                          | secreted              | extracellular exosome            |
| <b>SNP29</b>       |                                                                                       | Autophagy, Cilium biogenesis/degradation, Protein transport, Transport                                                   | cytoplasm             | cell membrane                    |
| <b>Spondin-2</b>   | Antigen binding                                                                       | Cell adhesion                                                                                                            | secreted              | extracellular space              |
| <b>SREBF2</b>      | Activator, DNA-binding                                                                | Cholesterol metabolism, Lipid metabolism, Steroid metabolism, Sterol metabolism, Transcription, Transcription regulation | cytoplasm             | endoplasmic reticulum, cytoplasm |
| <b>STOML2</b>      | cardiolipin binding, GTPase binding, receptor binding                                 |                                                                                                                          | cell membrane         | cell membrane, cytoskeleton      |
| <b>SULF1</b>       | Hydrolase                                                                             | Apoptosis                                                                                                                | endoplasmic reticulum | cell surface                     |
| <b>TCF3</b>        | DNA-binding                                                                           | Differentiation, Neurogenesis, Transcription regulation                                                                  | nucleus               | cytoplasm                        |
| <b>TFF3</b>        |                                                                                       | defense response, wound healing                                                                                          | secreted              | cytoplasm, extracellular matrix  |
| <b>TIMP1</b>       | Growth factor, Metalloenzyme inhibitor, Metalloprotease inhibitor, Protease inhibitor | aging, cartilage development, cell activation                                                                            | secreted              | extracellular exosome            |
| <b>TNF-R1</b>      | Receptor                                                                              | Apoptosis, Host-virus interaction                                                                                        | secreted              | golgi apparatus                  |
| <b>TRFM</b>        | iron ion binding                                                                      | Ion transport, Iron transport, Transport                                                                                 | cell membrane         | cell membrane                    |
| <b>TRY2</b>        | hydrolase, protease, Serine protease, calcium-ion binding                             | anti-microbial humoral response, digestion                                                                               | secreted              | extracellular space              |
| <b>TSLC1</b>       | Developmental protein                                                                 | Apoptosis, Cell adhesion, Differentiation, Immunity, Spermatogenesis                                                     | extracellular exosome | cell membrane                    |
| <b>TUBB5</b>       | GTPase activity and binding                                                           | cell division, cell process                                                                                              | cytoplasm             | cytoplasm                        |
| <b>VEGF</b>        | Developmental protein, Growth factor, Heparin-binding,                                | Angiogenesis, Differentiation                                                                                            | secreted              | extracellular space              |
| <b>ZNF346</b>      | RNA-binding                                                                           | positive regulation of apoptotic process                                                                                 | nucleus               | cytoplasm, nucleus               |
| <b>ZNF638</b>      | Activator, DNA-binding, RNA-binding                                                   | Transcription, Transcription regulation                                                                                  | nucleus speckle       | nucleus, cytoplasm               |
| <b>ZNF700</b>      | DNA-binding                                                                           | Transcription, Transcription regulation                                                                                  | nucleus               | nucleus, cytoplasm               |

Table S4. QUADAS-2 risk of bias assessment of the studies [18].

| Study                   | Risk of Bias      |            |                    |                 | Applicability Concerns |            |                    |
|-------------------------|-------------------|------------|--------------------|-----------------|------------------------|------------|--------------------|
|                         | Patient Selection | Index Test | Reference Standard | Flow and Timing | Patient Selection      | Index Test | Reference Standard |
| Broll, 2001 [56]        |                   |            |                    |                 |                        |            |                    |
| Nam, 2005 [66]          |                   |            |                    |                 |                        |            |                    |
| Albrethsen, 2006 [60]   |                   |            |                    |                 |                        |            |                    |
| Roeßler, 2005 [57]      |                   |            |                    |                 |                        |            |                    |
| Wu, 2008 [35]           |                   |            |                    |                 |                        |            |                    |
| Wu, 2008 [36]           |                   |            |                    |                 |                        |            |                    |
| Babel, 2009 [50]        |                   |            |                    |                 |                        |            |                    |
| Kim, 2009 [47]          |                   |            |                    |                 |                        |            |                    |
| Yoneda, 2009 [41]       |                   |            |                    |                 |                        |            |                    |
| Ji, 2010 [45]           |                   |            |                    |                 |                        |            |                    |
| Kijanka, 2010 [62]      |                   |            |                    |                 |                        |            |                    |
| Tagi, 2010 [40]         |                   |            |                    |                 |                        |            |                    |
| Xie, 2010 [27]          |                   |            |                    |                 |                        |            |                    |
| Xue, 2010 [28]          |                   |            |                    |                 |                        |            |                    |
| Babel, 2011 [51]        |                   |            |                    |                 |                        |            |                    |
| Fan, 2011 [38]          |                   |            |                    |                 |                        |            |                    |
| Hamelin, 2011 [61]      |                   |            |                    |                 |                        |            |                    |
| Han, 2011 [21]          |                   |            |                    |                 |                        |            |                    |
| Kuo, 2011 [39]          |                   |            |                    |                 |                        |            |                    |
| Matsubara, 2011 [42]    |                   |            |                    |                 |                        |            |                    |
| Weiss, 2011 [59]        |                   |            |                    |                 |                        |            |                    |
| Barderas, 2012 [52]     |                   |            |                    |                 |                        |            |                    |
| Fijneman, 2012 [63]     |                   |            |                    |                 |                        |            |                    |
| Hosono, 2012 [44]       |                   |            |                    |                 |                        |            |                    |
| Ladd, 2012 [65]         |                   |            |                    |                 |                        |            |                    |
| Lee, 2012 [48]          |                   |            |                    |                 |                        |            |                    |
| Rodriguez-P, 2012 [54]  |                   |            |                    |                 |                        |            |                    |
| Yao, 2012 [30]          |                   |            |                    |                 |                        |            |                    |
| Barderas, 2013 [53]     |                   |            |                    |                 |                        |            |                    |
| Ji, 2013 [22]           |                   |            |                    |                 |                        |            |                    |
| Wang, 2013 [25]         |                   |            |                    |                 |                        |            |                    |
| Jiang, 2014 [23]        |                   |            |                    |                 |                        |            |                    |
| Niewiarowska, 2014 [64] |                   |            |                    |                 |                        |            |                    |
| Shin, 2014 [46]         |                   |            |                    |                 |                        |            |                    |
| Sole, 2014 [55]         |                   |            |                    |                 |                        |            |                    |
| Toiyama, 2014 [43]      |                   |            |                    |                 |                        |            |                    |
| Xue, 2014 [29]          |                   |            |                    |                 |                        |            |                    |

|                     |                                                                                   |                                                                                   |                                                                                   |                                                                                   |                                                                                     |                                                                                     |                                                                                     |
|---------------------|-----------------------------------------------------------------------------------|-----------------------------------------------------------------------------------|-----------------------------------------------------------------------------------|-----------------------------------------------------------------------------------|-------------------------------------------------------------------------------------|-------------------------------------------------------------------------------------|-------------------------------------------------------------------------------------|
| Chiang, 2015 [37]   | 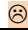 | 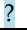 | 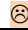 | 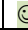 | 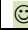 | 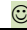 | 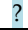 |
| Lin, 2015 [49]      | 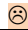 | 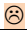 | 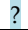 | 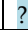 | 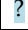 | 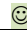 | 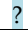 |
| Qiao, 2015 [24]     | 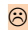 | 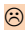 | 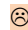 | 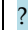 | 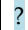 | 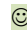 | 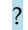 |
| Surinova, 2015 [58] | 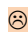 | 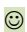 | 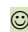 | 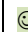 | 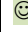 | 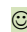 | 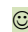 |
| Taguchi, 2015 [67]  | 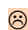 | 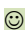 | 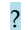 | 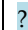 | 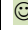 | 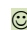 | 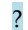 |
| Zhang, 2015 [33]    | 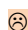 | 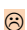 | 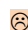 | 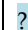 | 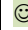 | 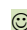 | 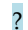 |
| Fan, 2016 [31]      | 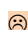 | 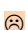 | 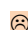 | 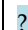 | 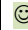 | 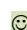 | 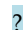 |
| Wang X, 2016 [26]   | 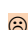 | 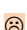 | 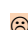 | 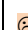 | 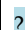 | 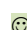 | 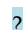 |
| Wang Y, 2016 [32]   | 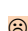 | 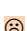 | 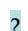 | 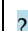 | 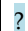 | 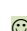 | 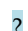 |
| Xie, 2016 [34]      | 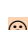 | 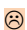 | 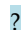 | 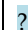 | 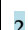 | 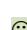 | 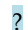 |

Note: In the above table 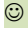 represents low risk, 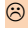 represents high risk and unclear risk is represented as 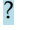

Table S5. PRISMA 2009 Checklist [20].

| Section/topic                      | #  | Checklist item                                                                                                                                                                                                                                                                                              | Reported on page # |
|------------------------------------|----|-------------------------------------------------------------------------------------------------------------------------------------------------------------------------------------------------------------------------------------------------------------------------------------------------------------|--------------------|
| <b>Title</b>                       |    |                                                                                                                                                                                                                                                                                                             |                    |
| Title                              | 1  | Identify the report as a systematic review, meta-analysis, or both.                                                                                                                                                                                                                                         | 1                  |
| <b>Abstract</b>                    |    |                                                                                                                                                                                                                                                                                                             |                    |
| Structured summary                 | 2  | Provide a structured summary including, as applicable: background; objectives; data sources; study eligibility criteria, participants, and interventions; study appraisal and synthesis methods; results; limitations; conclusions and implications of key findings; systematic review registration number. | 1                  |
| <b>Introduction</b>                |    |                                                                                                                                                                                                                                                                                                             |                    |
| Rationale                          | 3  | Describe the rationale for the review in the context of what is already known.                                                                                                                                                                                                                              | 2                  |
| Objectives                         | 4  | Provide an explicit statement of questions being addressed with reference to participants, interventions, comparisons, outcomes, and study design (PICOS).                                                                                                                                                  | 2                  |
| <b>Methods</b>                     |    |                                                                                                                                                                                                                                                                                                             |                    |
| Protocol and registration          | 5  | Indicate if a review protocol exists, if and where it can be accessed (e.g., Web address), and, if available, provide registration information including registration number.                                                                                                                               | 2                  |
| Eligibility criteria               | 6  | Specify study characteristics (e.g., PICOS, length of follow-up) and report characteristics (e.g., years considered, language, publication status) used as criteria for eligibility, giving rationale.                                                                                                      | 2, 5               |
| Information sources                | 7  | Describe all information sources (e.g., databases with dates of coverage, contact with study authors to identify additional studies) in the search and date last searched.                                                                                                                                  | 2, S1              |
| Search                             | 8  | Present full electronic search strategy for at least one database, including any limits used, such that it could be repeated.                                                                                                                                                                               | S1                 |
| Study selection                    | 9  | State the process for selecting studies (i.e., screening, eligibility, included in systematic review, and, if applicable, included in the meta-analysis).                                                                                                                                                   | 2, 5               |
| Data collection process            | 10 | Describe method of data extraction from reports (e.g., piloted forms, independently, in duplicate) and any processes for obtaining and confirming data from investigators.                                                                                                                                  | 2                  |
| Data items                         | 11 | List and define all variables for which data were sought (e.g., PICOS, funding sources) and any assumptions and simplifications made.                                                                                                                                                                       | 2                  |
| Risk of bias in individual studies | 12 | Describe methods used for assessing risk of bias of individual studies (including specification of whether this was done at the study or outcome level), and how this information is to be used in any data synthesis.                                                                                      | 2                  |
| Summary measures                   | 13 | State the principal summary measures (e.g., risk ratio, difference in means).                                                                                                                                                                                                                               | 2, 7–9             |
| Synthesis of results               | 14 | Describe the methods of handling data and combining results of studies, if done, including measures of consistency (e.g., $I^2$ ) for each meta-analysis.                                                                                                                                                   | -                  |

| Section/topic                 | #  | Checklist item                                                                                                                                                                                           | Reported on page # |
|-------------------------------|----|----------------------------------------------------------------------------------------------------------------------------------------------------------------------------------------------------------|--------------------|
| Risk of bias across studies   | 15 | Specify any assessment of risk of bias that may affect the cumulative evidence (e.g., publication bias, selective reporting within studies).                                                             | 7, 27              |
| Additional analyses           | 16 | Describe methods of additional analyses (e.g., sensitivity or subgroup analyses, meta-regression), if done, indicating which were pre-specified.                                                         |                    |
| <b>Results</b>                |    |                                                                                                                                                                                                          |                    |
| Study selection               | 17 | Give numbers of studies screened, assessed for eligibility, and included in the review, with reasons for exclusions at each stage, ideally with a flow diagram.                                          | 3, 5               |
| Study characteristics         | 18 | For each study, present characteristics for which data were extracted (e.g., study size, PICOS, follow-up period) and provide the citations.                                                             | 3, 11–12           |
| Risk of bias within studies   | 19 | Present data on risk of bias of each study and, if available, any outcome level assessment (see item 12).                                                                                                | 4–10               |
| Results of individual studies | 20 | For all outcomes considered (benefits or harms), present, for each study: (a) simple summary data for each intervention group (b) effect estimates and confidence intervals, ideally with a forest plot. | 14–15              |
| Synthesis of results          | 21 | Present results of each meta-analysis done, including confidence intervals and measures of consistency.                                                                                                  | -                  |
| Risk of bias across studies   | 22 | Present results of any assessment of risk of bias across studies (see Item 15).                                                                                                                          | SF4                |
| Additional analysis           | 23 | Give results of additional analyses, if done (e.g., sensitivity or subgroup analyses, meta-regression [see Item 16]).                                                                                    | -                  |
| <b>Discussion</b>             |    |                                                                                                                                                                                                          |                    |
| Summary of evidence           | 24 | Summarize the main findings including the strength of evidence for each main outcome; consider their relevance to key groups (e.g., healthcare providers, users, and policy makers).                     | 14–15              |
| Limitations                   | 25 | Discuss limitations at study and outcome level (e.g., risk of bias), and at review-level (e.g., incomplete retrieval of identified research, reporting bias).                                            | 15                 |
| Conclusions                   | 26 | Provide a general interpretation of the results in the context of other evidence, and implications for future research.                                                                                  | 15                 |
| <b>Funding</b>                |    |                                                                                                                                                                                                          |                    |
| Funding                       | 27 | Describe sources of funding for the systematic review and other support (e.g., supply of data); role of funders for the systematic review.                                                               | 15                 |
